1  
2  
3  
4  
5  
6  
7  
8  
9  
10  
11  
12  
13  
14  
15  
16  
17  
18  
19  
20  
21  
22  
23  
24  
25  
26  
27  
28  
29  
30  
31  
32  
33  
34  
35  
36  
37  
38  
39  
40

## **Plug and play: Is “directed endosymbiosis” of chloroplasts possible?**

Karin Olszewski Shapiro

Department of Biological Sciences, Florida Atlantic University, Boca Raton, Florida, United States of America

Department of Microbiology and Cell Science, University of Florida, Gainesville, Florida, United States of America

E-mail: [kshap@comcast.net](mailto:kshap@comcast.net)

## 42 **Abstract**

43

44           The origin of mammalian mitochondria and plant chloroplasts is thought to be  
45 endosymbiosis. Millennia ago, a bacterium related to typhus-causing bacteria may have been  
46 consumed by a proto-eukaryote and over time evolved into an organelle inside eukaryotic cells,  
47 known as a mitochondrion. The plant chloroplast is believed to have evolved in a similar fashion  
48 from cyanobacteria. This project attempted to use “directed endosymbiosis” (my term) to  
49 investigate if chloroplasts can be taken up by a land animal and continue to function. It has been  
50 shown previously that mouse fibroblasts could incorporate isolated chloroplasts when co-  
51 cultured. Photosynthetic bacteria containing chloroplasts have been successfully injected into  
52 zebrafish embryos, mammalian cells, and ischemic rodent hearts. The photosynthetic alga  
53 *Chlamydomonas reinhardtii* (*C. reinhardtii*) has also been injected into zebrafish embryos.  
54 However, to the best of my knowledge, injection of isolated chloroplasts into a land animal  
55 embryo has not been attempted before.

56           In four pilot experiments, solutions of chloroplasts in PBS were microinjected into  
57 *Drosophila melanogaster* (*D. melanogaster*) embryos to determine if the embryos would tolerate  
58 the foreign protein. Interestingly, results indicated that a portion of the *D. melanogaster* embryos  
59 appeared to tolerate the injections and survive to adulthood. To determine if chloroplasts had  
60 indeed been transferred, larvae were placed under fluorescent microscopy. Chlorophyll (serving  
61 as the reporter) was found to be present in several larvae and to decline in amount over time. To  
62 investigate if the chloroplasts still functioned, a radiotracer food intake assay was performed. It  
63 was hypothesized that if the chloroplasts were generating ATP (and possibly glucose), the larvae  
64 might need less food. Results indicated a decrease in intake, however this might have occurred  
65 for other reasons.

## 66 **Introduction**

67           Humans have three energy systems: an aerobic process involving endosymbiotic  
68 mitochondria which provides us with the majority of our ATP supply; anaerobic glycolysis  
69 which breaks down glycogen into glucose when oxygen levels are low; and the anaerobic  
70 phosphocreatine system which uses muscle phosphocreatine to produce ATP. Plants have two  
71 endosymbiotic systems: chloroplasts which use light energy to convert atmospheric CO<sub>2</sub> to  
72 glucose in the Calvin cycle; and mitochondria.

73           Mitochondria might be viewed as a “double-edged sword” for eukaryotes. On the one  
74 hand, these organelles provide us with 13 times more ATP than anaerobic respiration.<sup>1</sup> On the  
75 other, the oxidative phosphorylation step of ATP production results in generation of cell-  
76 damaging reactive oxygen species (ROS). In plants, the chloroplast structure contains “thylakoid  
77 membranes” housing chlorophyll pigments,<sup>2,3</sup> and “stroma,” fluid-filled regions containing  
78 NADP<sup>+</sup>. Chlorophyll absorbs photons, exciting electrons which then reduce NADP<sup>+</sup> to NADPH  
79 in the stroma. Chlorophyll regains its electrons when water is photolysed, releasing gaseous  
80 oxygen.<sup>4</sup> Photolysis releases protons (H<sup>+</sup>) which flow against their concentration gradient from  
81 the stroma to the thylakoid lumen. The enzyme ATP synthase then uses the energy from the  
82 gradient to generate ATP in the stroma. It is hypothesized that if ATP supply could be  
83 “augmented” in an animal by chloroplasts, food intake might decrease and hence less ROS may  
84 be generated by mitochondria. This might result in less ROS damage, leading to possible health  
85 benefits. It is interesting to speculate if longevity might also be affected. There appears to be an  
86 inverse relationship between food intake and life span. This relationship has been observed since  
87 the 1930s in multiple species.<sup>5,6</sup>

88

89 Support for this experiment may arise from Dr. Christina Agapakis' 2011 Harvard  
90 master's thesis in which the cyanobacterium *Synechococcus elongatus* (*S. elongatus*) was  
91 successfully microinjected into zebrafish embryos, with survival of both.<sup>7</sup> In addition, *D.*  
92 *melanogaster* has been shown to already contain the endosymbionts *Spiroplasma* and  
93 *Wolbachia*.<sup>8</sup> Further, an example of ATP augmentation in a marine animal already exists in  
94 nature. The sea slug *Elysia chlorotica* is reported to ingest chloroplasts from the alga *Vaucheria*  
95 *litorea* and derive nourishment from chloroplast photosynthesis for up to nine months.<sup>9</sup> Health  
96 benefits from an endosymbiosis-like procedure have been discovered for cardiovascular disease.  
97 Stanford researchers Cohen et al. injected photosynthetic cyanobacteria *S. elongatus* into  
98 ischemic rodent hearts. Surprisingly, the results were a 25-fold increase in oxygenation vs.  
99 ischemic nadir.<sup>10</sup> The goal of this experiment is to create a biomedical implant or patch  
100 containing chloroplasts, which might result in improvement of human health.

## 101 **Materials and Methods**

### 102 **Chloroplast Isolation**

103 For all trials, chloroplasts were isolated from spinach leaves using the Minute Chloroplast  
104 Isolation Kit (Product no. CP-011) from Invent Biotechnologies, Inc. (Plymouth, MN, USA).  
105 Isolation was performed at the Binniger lab at Florida Atlantic University. The kit contains  
106 filter cartridges with pore sizes designed to select for intact chloroplasts (>90% intact).  $1 \times 10^6$  to  
107  $1 \times 10^7$  chloroplasts are pelletized by centrifugation and extraneous plant tissue remains in the  
108 cartridge. A homogenous sample solution was prepared by suspending the chloroplasts in PBS.  
109 Viability of the chloroplasts was tested using a 2,6-Dichlorophenolindophenol (DPIP)  
110 colorimetric assay. DPIP 0.1% solution was obtained from Carolina Biological Supply  
111 Company, Burlington, NC, USA (Product no. 746863). DPIP can act as a substitute electron

112 acceptor for the chloroplast photosynthetic electron transport chain (ETC). Photosynthesis  
113 normally uses NADP<sup>+</sup>. DPIP is a blue solution that turns clear as it becomes reduced. A clear  
114 color result should indicate photosynthesis function. Color change of the DPIP treated solution  
115 was checked both visually and by spectrophotometer (Thermo Fisher Spectronic 20D+)  
116 transmittance reading (wavelength was set to 605nm.<sup>11,12</sup>)

## 117 **Fly Stock and Microinjection**

118 For Trials 1-4, microinjection was performed by Rainbow Transgenic Flies, Inc.  
119 (Camarillo, CA, USA) (Rainbow Transgenic) using in-house stock male and female *D.*  
120 *melanogaster w<sup>1118</sup>* which is a commonly used mutant strain (the mutation is in the *w* gene of the  
121 eye pigmentation pathway). At the time of injection, the flies were one-half to one hour old.  
122 Samples were injected in the germline (posterior) area.

123 In Trial 1, Rainbow Transgenic centrifuged a portion of the sample 1mL chloroplast/PBS  
124 solution using a Beckman Microfuge 16 centrifuge set at 5000rpm (equivalent to 1845g) for two  
125 minutes. No control was used as the purpose for this trial was to see if the injection was  
126 technically possible. Two groups of flies were injected as follows: (1) 134 embryos with non-  
127 spun chloroplast/1mL PBS solution; and (2) 130 embryos with spun chloroplast/1mL PBS  
128 supernatant. The sample was shipped overnight to Rainbow Transgenic on November 30, 2020.  
129 The company performed the injection on December 10 and overnighed the larvae to me on  
130 December 14, resulting in a 15-day time lag between chloroplast isolation and observation.

131 In Trials 2-4, no centrifugation was done. Instead, dilution was increased from 1mL to  
132 2mL, 3mL and 4mL groups. PBS only controls were added. Sample solutions were shipped  
133 overnight in cold-pack boxes. Injected larvae were returned overnight the day of injection,  
134 resulting in a much improved 2-day time lag.

## 135 **<sup>32</sup>P-Labeled Food Intake Assay**

136           The <sup>32</sup>P-labeled food intake assay was performed at the Ja lab at Scripps Research  
137 Institute. Larvae delivered on agar plates were transferred to standard stock food bottles and  
138 placed in a 25°C incubator to await the optimal developmental stage for the assay. There  
139 appeared to be good survival, ranking from control group (best), 3mL (next) and 2mL (least).  
140 There were clear developmental differences between the groups, following the same ranking  
141 order. Since the differences did not normalize enough for homogenous testing, non-pupariating  
142 larvae (located on the food area of the bottles, not the sides) were floated from the food with a  
143 20% sucrose solution, then collected by pipette and rinsed with water. In this way, presence of  
144 pupae or wandering 3<sup>rd</sup> instar larvae was avoided (larvae at this stage may reduce food intake).  
145 Larvae were transferred to <sup>32</sup>P-labeled 2% yeast extract/5% sucrose food to perform the 6-hour  
146 assay. Individual larvae were then scintillation counted in 2.5mL fluid.

## 147 **Chlorophyll Fluorescence Microscopy**

148           Fluorescence microscopy was performed at the McFarland lab at Florida Atlantic  
149 University, Harbor Branch Oceanographic Institute. Larvae were viewed using a Nikon Eclipse  
150 Ni-U microscope with an epifluorescence attachment, DS-Ri2 color camera, and installed filter  
151 cube (Chroma 49012 - ET - FITC/EGFP Longpass). The filter cube, when combined with the  
152 color camera, allows visualization of chlorophyll autofluorescence. Rainbow Transgenic  
153 provided the sample and control larvae taped to slides for ease of placement on the microscope  
154 stage.

155

156

## 157 **Results**

158 Chloroplasts were isolated from baby spinach leaves using the Minute Chloroplast  
159 Isolation Kit, which selects for intact chloroplasts (>90% intact). Homogenous samples  
160 containing  $1 \times 10^6$  to  $1 \times 10^7$  chloroplasts were suspended in increasing dilutions of 1-3mL PBS  
161 (Fig 1).

### 162 **Fig 1. Chloroplasts Suspended in 1mL, 2mL and 3mL PBS.**

163 Image 1: Chloroplasts in 1mL PBS. Image 2: Chloroplasts in 2mL PBS. Image 3: Chloroplasts in  
164 3mL PBS. Photos taken with an Amscope MU300 microscope camera on an Amscope M150C  
165 light microscope at 150x.

166 Viability of chloroplasts was tested using a DPIP colorimetric assay. DPIP can act as a  
167 substitute electron acceptor for the chloroplast ETC. DPIP is a blue solution that turns clear as it  
168 becomes reduced, therefore the clearer the result, the greater the photosynthetic function.<sup>11,12</sup>  
169 Two solutions were prepared: (1) control: 600 uL ultrapure water + 6 drops of chloroplast/1mL  
170 PBS suspension; and (2) sample: control solution + 200uL 0.1% DPIP added. At time 11  
171 minutes, the color of the sample cuvette had changed from dark to pale blue, indicating possible  
172 photosynthetic activity (Fig 2).

### 173 **Fig 2. Visual Results of 0.1% DPIP Test on 1mL Chloroplast Solution.**

174 Image 1: Cuvette 1B (left) control solution - 600 uL ultrapure water + 6 drops of  
175 chloroplast/1mL PBS suspension at time 0. Cuvette 3DPIP (right) sample solution – control +  
176 200uL 0.1% DPIP at time 0. Cuvette 1B is pale green. Cuvette 3DPIP is dark blue. Image 2:  
177 Cuvette 1B (left) control solution - 600 uL ultrapure water + 6 drops of chloroplast/1mL PBS  
178 suspension at time 11 minutes. Cuvette 3DPIP (right) sample solution – control + 200uL 0.1%

179 DPIP at time 11 minutes. Cuvette 1B remained pale green. Cuvette 3DPIP appeared to change  
180 color from dark to pale blue which may indicate active photosynthesis.

181 Clarity of DPIP was also tested by spectrophotometry. An additional two solutions were  
182 prepared: (1) control: 4mL distilled water + 6 drops of chloroplast/1mL PBS suspension; and (2)  
183 sample: control solution + 200uL 0.1% DPIP added. At time 19 minutes, the spectrophotometer  
184 transmittance reading had changed from 40.2% to 74.0%, indicating possible photosynthetic  
185 activity (Fig 3).

### 186 **Fig 3. Spectrophotometer Results of 0.1% DPIP Test on 5mL Chloroplast Solution.**

187 Image 1: Vial S (left) sample solution – control + 200uL 0.1% DPIP at time 0. Vial C (right)  
188 control solution – 4mL distilled water + 6 drops of chloroplast/1mL PBS suspension at time 0.

189 Image 2: Vial S spectrophotometer transmittance reading at time 0 – 40.2%. Image 3: Vial S  
190 (left) sample solution – control + 200uL 0.1% DPIP at time 19 minutes. Vial C (right) control  
191 solution - 4mL distilled water + 6 drops of chloroplast/1mL PBS suspension at time 19 minutes.

192 Image 4: Vial S spectrophotometer transmittance reading at time 19.0 minutes – 74.0%. The  
193 control vial was used as the blank (transmittance set to 100%). The increase in light  
194 transmittance correlates with the solution becoming clearer as shown in Fig 2. This may indicate  
195 active photosynthesis.

### 196 **Trial 1**

197 The purpose of Trial 1 was simply to see if microinjection of a chloroplast solution into  
198 *D. melanogaster* was technically possible. For this reason, a control solution was not included. A  
199 chloroplast/1mL PBS suspension was sent overnight to Rainbow Transgenic at room  
200 temperature. The company divided it into two samples – one centrifuged at 1845g for two  
201 minutes and the other not. It was found that the supernatant from the spun solution was markedly



202 easier to inject than the non-spun one. 50 of 130 embryos survived the supernatant injection and  
203 4 of 134 survived the non-spun injection. Out of the 50, approximately 30 ecdoded (emerged  
204 from pupae). Out of the 4, 2 ecdoded. Both groups survived for approximately two and a half  
205 weeks which falls below their average half-life (point of 50% survival) of approximately 45  
206 days<sup>13</sup> (Fig 4). This result appeared to indicate that chloroplasts can be injected into fly embryos  
207 without immediate lethality. However, without microscopy, it was not possible to know if the  
208 spun solution pelleted all the chloroplasts. Please see below.

209 **Fig 4. Photos of Vials Containing Injected *D. melanogaster*.**

210 Photos of vials containing injected *D. melanogaster*. Image 1: Vial on left contains supernatant  
211 injected embryos on Day 6 post-injection. 50 embryos out of 130 survived. Vial on right contains  
212 embryos injected with non-spun chloroplast 1mL solution on Day 6 post-injection. 4 embryos  
213 out of 134 survived. Image 2: Vial on left contains supernatant injected embryos on Day 18 post-  
214 injection. ~30 embryos out of 50 ecdoded. Vial on right contains embryos injected with non-spun  
215 chloroplast 1mL solution on Day 18. 2 embryos out of 4 ecdoded.

216 **Trial 2 – Part 1**

217 Building on the results of Trial 1, it was decided not to perform centrifugation. Instead,  
218 different dilutions were tested to observe which would work best. 2mL and 3mL suspensions,  
219 along with a PBS only control, were sent to Rainbow Transgenic overnight in a cold pack box.  
220 Rainbow Transgenic injected 250 embryos with the control, 315 with the 2mL dilution and 264  
221 with the 3mL dilution. The company reported that the injections proceeded with increasing levels  
222 of difficulty, the control being the least and the 2mL dilution the most. Short video clips were  
223 taken of each injection group (Fig 5).

224

225 **Fig 5. Screen Capture from Control Group Microinjection.**

226 Screen capture from video taken by Rainbow Transgenic on March 24, 2021.

227 Survival was compared for larvae in Trial 1 vs. Trial 2. The 1mL non-spun solution and  
228 the 2mL dilution had similar survival rates (3.0% and 3.8%, respectively). The survival rate for  
229 the 3mL dilution was ~3.2 fold higher than for the 2mL dilution (Table 1). It was determined that  
230 3mL appeared to be the best compromise to date between ease of injection and not over-diluting.

231 **Table 1. Comparison of Larvae Survival - Trial 1 vs. Trial 2.**

| <b>Trial 1 Larvae Sets<br/>(Centrifuged sample solution)</b>              | <b>Surviving<br/>Larvae</b> | <b>Total Larvae</b> | <b>% Surviving Larvae</b> |
|---------------------------------------------------------------------------|-----------------------------|---------------------|---------------------------|
| Sample 1-Injected with supernatant from spun chloroplast/1mL PBS solution | 50                          | 130                 | 38.5                      |
| Sample 2-Injected with non-spun chloroplast/1mL PBS solution              | 4                           | 134                 | 3.0                       |
| <b>Trial 2 Larvae Sets<br/>(Diluted sample solutions)</b>                 | <b>Surviving<br/>Larvae</b> | <b>Total Larvae</b> | <b>% Surviving Larvae</b> |
| Control 1-Injected with PBS only                                          | 40                          | 250                 | 16.0                      |
| Sample 1-Injected with chloroplast/2mL PBS solution                       | 12                          | 315                 | 3.8                       |
| Sample 2-Injected with chloroplast/3mL PBS solution                       | 32                          | 264                 | 12.1                      |

232  
233 Table 1. The 1mL non-spun solution and the 2mL dilution had similar survival rates (3.0% and  
234 3.8%, respectively). The survival rate for the 3mL dilution was ~3.2 fold higher than for the 2mL  
235 dilution.

236

237

238 **Trial 2 – Part 2**

239 Since survival improved over Trial 1, it was decided to test if the chloroplasts were  
240 possibly augmenting the embryos' ATP supply. To indirectly determine this, food intake was  
241 measured. If food intake decreased, this might provide support for gain of energy from the  
242 chloroplasts.

243 Radio tracer studies on food intake for each group were performed as described in  
244 Materials and Methods above. Mean food intake was highest for the control (0.76mg), with the  
245 3mL group next (0.49mg) and the 2mL group last (0.38mg). (Table 2 and Chart 1)

246 **Table 2. Food Intake (mg) for Sample *D. melanogaster* Larvae.**

247

|                   | Feeding (mg/larva) |          |          |
|-------------------|--------------------|----------|----------|
|                   | Control            | 3mL      | 2mL      |
|                   | 0.045480           | 0.735730 | 0.120743 |
|                   | 2.054650           | 0.718423 | 0.979631 |
|                   | 1.058919           | 1.015049 | 0.153747 |
|                   | 0.825482           | 1.354338 | 0.269258 |
|                   | 0.114304           | 0.101424 | 0.596875 |
|                   | 1.262573           | 0.042260 | 0.135233 |
|                   | 0.147307           | 0.687030 |          |
|                   | 0.589228           | 0.659661 |          |
|                   |                    | 0.765915 |          |
|                   |                    | 0.311518 |          |
|                   |                    | 0.217338 |          |
|                   |                    | 0.204861 |          |
|                   |                    | 0.085728 |          |
|                   |                    | 0.076068 |          |
|                   |                    | 0.768733 |          |
|                   |                    | 0.054335 |          |
| <b>Larvae no.</b> | 8                  | 16       | 6        |
| <b>Mean</b>       | 0.762243           | 0.487401 | 0.375914 |

248

249 Table 2. Food intake (mg) for individual larva. These larvae represent the portion that was

250 floated from the food area with 20% sucrose. If max outliers are removed (highlighted in

251 yellow), the averages change to 0.577613mg, 0.429605mg and 0.255171mg, respectively.

252 (Source: Ja lab radio tracer study)

253 **Chart 1. Mean Food Intake per Larvae Group – Standard Deviation.**

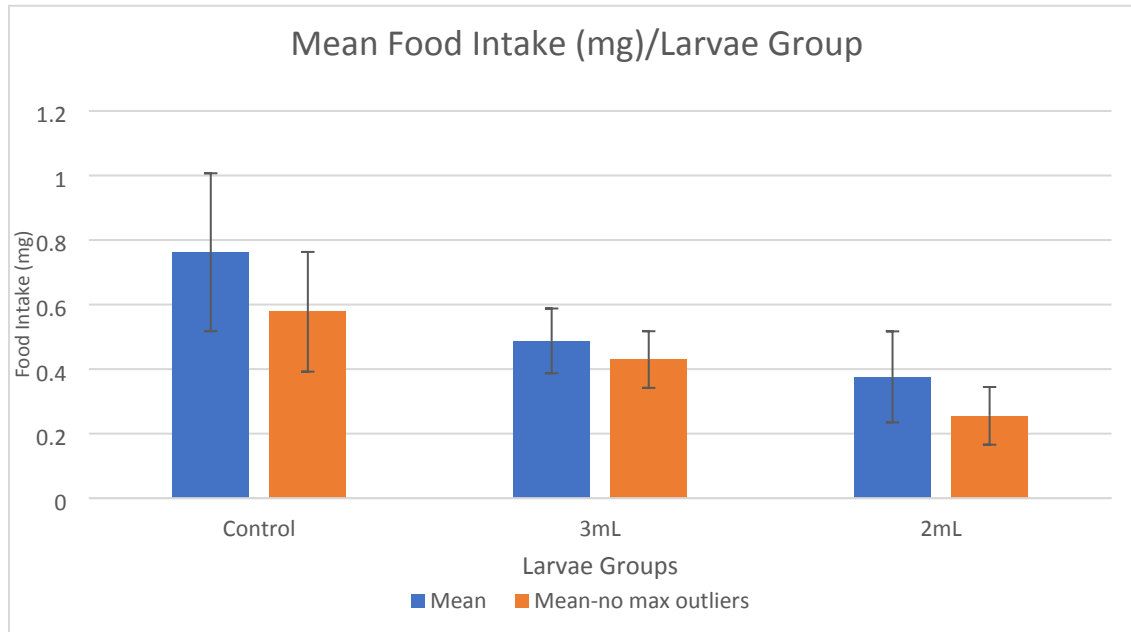

254  
255

256 Chart 1. When max outliers are removed, standard deviation and error bars decrease. Mean food  
257 intake is highest for the control and successively decreases for the 3mL and 2mL groups.

258 (Source: Adapted from Ja lab chart. I included additional column with max outliers deleted.)

259 As of April 12 (19 days post-injection), the non-food tested larvae appear to be thriving  
260 (Fig 6).

261 **Fig 6. Non-Food Tested Larvae 19 Days Post-Injection.**

262 All three groups appear to be thriving.

263 **Trial 3**

264  
265

266 Fluorescence microscopy was performed to investigate if the microinjections successfully  
267 transferred chloroplasts into the embryos. Rainbow Transgenic provided four slides to which  
268 larvae had been taped as follows: (1) Control 1 – 100 non-injected larvae; (2) Control 2 - 270

268 larvae injected with PBS only; and (3) Sample - 160 larvae injected with chloroplast/3mL PBS  
269 solution divided among two slides. Rainbow Transgenic reported that it had been more difficult  
270 to inject the chloroplast/3mL PBS sample solution than in Trial 2. A possible cause might be  
271 slight variation in the amount of spinach leaf used for chloroplast extraction.

272 The slides were viewed under Lumencor Sola -generated blue light (450-490 nm) using a  
273 Nikon Eclipse Ni-U microscope.<sup>14</sup> There appeared to be little interference from room ambient  
274 light. The expected result was that the larvae would appear green due to biological  
275 autofluorescence and any chlorophyll present would appear red. As in all living cells, larval  
276 autofluorescence is caused by the natural fluorescence of certain biological molecules such as  
277 pyridine nucleotides and flavins.<sup>15</sup> Chlorophyll absorbs blue light which can be dissipated as  
278 heat, stored or used in other processes. The remaining blue light is emitted as longer wavelength  
279 red light.<sup>16</sup>

280 When viewed with the color camera, Control 1 (non-injected) appeared green with no  
281 visible red dots. Control 2 (PBS only) visualized green, with one red dot seen in one of the  
282 larvae. This may have been due to possible cross-contamination. The chloroplast/3mL PBS  
283 sample appeared green with a few scattered instances of red dots. Only one larva in this group  
284 showed presence of multiple red dots. (Fig 7) This result may have been caused by several  
285 factors. The chloroplasts may possibly have been degraded to some extent by the nascent  
286 immune system.<sup>17,18</sup> Embryonic development during the approximate 2-day transit time  
287 transitions from syncytial to multicellular (cellularization).<sup>18</sup> This might have interfered with the  
288 chloroplasts in a manner yet to be determined. Chloroplasts are no longer free-living organisms  
289 and may degrade in an unadapted host. In addition, prolonged exposure to light causes  
290 “photobleaching” of chlorophyll due to repeated cycles of excitation/emission. Fluorophores

291 have a finite number of cycles before photon emission becomes disabled.<sup>19</sup> The reported  
292 difficulty with injection may have contributed as well.

293 **Fig 7. Images of *D. melanogaster* Sample and Controls Taken with Fluorescent Microscopy**  
294 **at a Resolution of 0.29 pixels  $\mu\text{m}^{-1}$ .**

295 Image 1: Control 1 larvae (non-injected) using 10x objective. Larvae appear green due to  
296 autofluorescence. No red dots indicating chlorophyll were observed. Image 2: Control 2 (PBS  
297 only) using 10x objective. Larvae appear green. One red dot observed near one larva (circled in  
298 red). Image 3: Sample (injected with chloroplast/3mL PBS solution) using 20x objective. Larvae  
299 appear green, with some scattered instances of red dots. One larva appeared to have multiple red  
300 dots (circled in red).

301 **Trial 4**

302 The fluorescent microscopy procedure as described in Trial 3 was repeated, with the only  
303 difference being replacement of the 3mL dilution with a 4mL one to lessen potential difficulty of  
304 injection. Rainbow Transgenic provided four slides to which larvae had been taped as follows:  
305 (1) Control 1 – 235 non-injected larvae; (2) Control 2 - 260 larvae injected with PBS only; and  
306 (3) Sample - 250 larvae injected with chloroplast/4mL PBS solution divided among two slides.  
307 Rainbow Transgenic reported that injection went well.

308 When viewed with the color camera, Control 1 (non-injected) appeared green with visible  
309 red dots seen between two of the larvae. This may have been due to possible cross-  
310 contamination. Control 2 (PBS only) visualized green, with no visible red dots. The  
311 chloroplast/4mL PBS sample appeared green with instances of red dots on 27 larvae. Three  
312 larvae in this group showed presence of multiple red dots. (Fig 8)

313 **Fig 8. Images of *D. melanogaster* Sample and Controls Taken with Fluorescent Microscopy**  
314 **at a Resolution of 0.29 pixels  $\mu\text{m}^{-1}$ .**

315 Image 1: Control 1 larvae (non-injected) using 10x objective. Larvae appear green due to  
316 autofluorescence. One area of red dots (circled in red) was visible between two larvae indicating  
317 chlorophyll was observed. Image 2: Control 2 (PBS only) using 10x objective. Larvae appear  
318 green with no visible red dots. Image 3: Sample (injected with chloroplast/4mL PBS solution)  
319 using 10x objective. Larvae appear green. 27 larvae show visible red dots. Three of these larvae  
320 appeared to have multiple red dots (example circled in red).

321 The percentage of larvae showing presence of chlorophyll increased from 1.9% in Trial 3  
322 to 10.8% in Trial 4 (Table 2). This ~5.7-fold increase may be attributable to the greater dilution  
323 of the sample solution in Trial 4 reducing difficulty of injection and the decrease in time lag  
324 between chloroplast isolation and microscopy (two days vs. 4 days). The 50% reduction in time  
325 lag meant that the larvae may have been at an earlier state of cellularization, thereby lessening  
326 possible disruption of the chloroplasts. In addition, possible immune reaction would have been at  
327 an earlier stage. Finally, possible chloroplast degradation in an unadapted host may also have  
328 been at an earlier stage.

329

330 **Table 2. Comparison of Fluorescent Microscopy Results - Trial 3 vs. Trial 4.**

| <b>Trial 3 Larvae Sets<sup>a</sup></b>            | <b>Larvae with Chlorophyll</b> | <b>Total Larvae</b> | <b>% Larvae with Chlorophyll</b> |
|---------------------------------------------------|--------------------------------|---------------------|----------------------------------|
| Control 1-Uninjected                              | 0                              | 100                 | 0                                |
| Control 2-Injected with PBS only                  | 1                              | 270                 | 0.37                             |
| Sample-Injected with chloroplast/3mL PBS solution | 3                              | 160                 | 1.9                              |
| <b>Trial 4 Larvae Sets<sup>b</sup></b>            | <b>Larvae with Chlorophyll</b> | <b>Total Larvae</b> | <b>% Larvae with Chlorophyll</b> |
| Control 1-Uninjected                              | 1                              | 235                 | 0.43                             |
| Control 2-Injected with PBS only                  | 0                              | 260                 | 0                                |
| Sample-Injected with chloroplast/4mL PBS solution | 27                             | 250                 | 10.8                             |

331 Table 2. The percentage of larvae showing presence of chlorophyll increased from 1.9% in Trial  
332 3 to 10.8% in Trial 4.

333 <sup>a</sup>Time lag from chloroplast isolation to microscopy: 4 days.

334 <sup>b</sup>Time lag from chloroplast isolation to microscopy: 2 days.

## 335 **Discussion**

### 336 **Embryo Survival**

337 As shown in the Results section, survival rates increased in Trial 2 vs. Trial 1. Survival  
338 could not be tracked for Trials 3 and 4 due to embryo damage from fluorescent microscopy.  
339 However, it was observed microscopically (especially in Trial 4) that the embryos were moving  
340 and had structures forming inside. Since injecting a chloroplast solution into embryos is a new



341 process both for the microinjection service and in general, a learning curve is involved. The  
342 average survival rate for standard forms of injection is ~50%. As knowledge increases in terms  
343 of the best dilution and injection technique, it is expected that survival rates should increase.

344 An additional point is that mutant strain  $w^{1118}$  has been found to be stress intolerant under  
345 deficient or enriched nutrient conditions (stress simulation).<sup>18</sup> One could extrapolate that despite  
346 this impairment, a portion of the larvae still survived. This might indicate that the injections may  
347 not have caused overwhelming stress even in such animals.

### 348 **Immune Reaction**

349 These pilot studies had interesting results, particularly related to the apparent low level of  
350 immune reaction. One of the possible outcomes of Trial 1 could have been lethality of the test  
351 animals due to strong immune response to the foreign chloroplast proteins. The 3% and 12%  
352 survival rates in Trials 1 and 2, respectively, seem to belie this. However, a number of other  
353 issues could have caused this: accidental non-injection of some of the embryos, possible less  
354 developed immune response in larvae vs. adults,<sup>17</sup> or the opposite – the larval immune system  
355 could have cleared the proteins. Detection of chlorophyll in Trials 3 and 4 indicate that a portion  
356 of the chloroplasts may have persisted for a certain amount of time. It is not possible to discern  
357 the exact role the immune system played without more sophisticated testing.

358 Three synthetic biology experiments mentioned previously showed apparent lack of an  
359 immune response to similar foreign proteins. These experiments involved injection of *S.*  
360 *elongatus* and *C. reinhardtii* into animal cells and *S. elongatus* into ischemic rodent hearts.  
361 Cyanobacteria are evolutionarily related to chloroplasts. Agapakis et al. found that *S. elongatus*  
362 did not seem immunogenic when injected into zebrafish embryos or mammalian CHO cells.<sup>7,20</sup>  
363 Cohen et al. reported that *S. elongatus* did not arouse increase in CD8 T-cells, CD4 T-cells or

364 CD19 B-cells in rodents.<sup>10</sup> Alvarez et al. noted that *C. reinhardtii* also did not arouse immune  
365 response in zebrafish embryos as determined by observation of neutrophils under confocal  
366 microscopy.<sup>21</sup> A fourth study by Nass found that isolated chloroplasts taken up by mouse  
367 fibroblasts remained in the cytoplasm, with no evidence of phagocytotic vesicles.<sup>22</sup> The latter  
368 study is particularly interesting in light of the endosymbiotic theory.<sup>23</sup>

### 369 **ATP Augmentation**

370 The decrease in food intake between the control and the samples does not support or  
371 negate if ATP augmentation occurred. Although food intake might be hypothesized to decrease if  
372 this event happened, there was too much variability in the larval conditions to ascribe it to a  
373 particular cause. Possible reasons include growth and stage differences, amount of damage from  
374 injection, and relatively low number of test animals. Yet, a decrease *did* occur, therefore energy  
375 augmentation cannot be ruled out. Again, more sophisticated testing is needed to compare ATP  
376 levels in control vs. injected embryos at different time points.

### 377 **Conclusion**

378 These pilot studies share a similar result with the four experiments mentioned above in  
379 that both isolated chloroplasts and cyanobacteria appear to survive initial introduction to a host.  
380 However, similar to the Nass experiment, the isolated chloroplasts decreased in number with  
381 time. It seems probable that the truncated genome of chloroplasts may be the cause. The majority  
382 of chloroplast genes have migrated to the host plant genome,<sup>24</sup> which would likely affect viability  
383 inside an unadapted organism. It is planned to use synthetic biology techniques to construct a  
384 minimal genetic complement to extend viability. Migrated genes would be successively  
385 transformed into chloroplasts to determine the optimal assembly for increased longevity. The  
386 transformed chloroplasts would be injected into *D. melanogaster* embryos and ATP and glucose

387 production measured *in vivo*. Test animals would be observed for biomarkers of immune  
388 response, oxygenation levels and life span/longevity. If results warrant, the next step would be to  
389 use a mammalian model. The eventual goal is to create an implant or patch for future biomedical  
390 use in humans.

391

## 392 **Acknowledgements**

393 We thank the Binninger lab (Florida Atlantic University) for overall support, the Ja lab (Scripps  
394 Research Institute) for technical assistance with the radiotracer assays and the McFarland lab  
395 (Florida Atlantic University, Harbor Branch Oceanographic Institute) for assistance with  
396 fluorescence microscopy.

397

398

## 399 References

400

401 1. Rich PR. The molecular machinery of Keilin's respiratory chain. Biochemical Society  
402 Transactions. 2003;31(Pt 6):1095–1105. [doi10.1042/BST0311095](https://doi.org/10.1042/BST0311095). [PMID 14641005](https://pubmed.ncbi.nlm.nih.gov/14641005/).

403

404 2. Dekker J, Boekema E. Supramolecular organization of thylakoid membrane proteins in green  
405 plants. Biochimica et Biophysica Acta (BBA) – Bioenergetics. 2005;1706(1–2):12-39.  
406 <https://www.sciencedirect.com/science/article/pii/S0005272804002749>

407

408 3. Von Wettstein D, Gough S, Kanangara GC. Chlorophyll biosynthesis. The Plant Cell. 1995;  
409 7:1039-1057. <https://www.ncbi.nlm.nih.gov/pmc/articles/PMC160907/>

410

411 4. Royal Society of Chemistry. Photosynthesis. 2021.

412 <https://www.rsc.org/Education/Teachers/Resources/cfb/Photosynthesis.htm>

413

414 5. McCay C, Crowell M. Prolonging the life span. The Scientific Monthly. 1934;39(5):405-414.

415 [www.jstor.org/stable/15813](http://www.jstor.org/stable/15813)

416

417 6. McDonald R, Ramsey J. Honoring Clive McCay and 75 years of calorie restriction research.

418 The Journal of Nutrition. 2010;140(7):1205–1210. <https://doi.org/10.3945/jn.110.122804>

419

420 7. Agapakis, C. Biological design principles for synthetic biology [M.Sc. Thesis]. Cambridge  
421 (MA): Harvard University; 2011. <http://agapakis.com/thesis.pdf>

422

423 8. Mateos M, Castrezana S, Nankivell B, Estes A, Markow T, Moran N. Heritable  
424 endosymbionts of *Drosophila*. Genetics. 2006;174(1):363-376.

425 <https://doi.org/10.1534/genetics.106.058818>

426

427 9. Kenney D. Sea slug has taken genes from alga it eats, allowing it to photosynthesize like a

428 plant. Phys.org. 2015. [https://phys.org/news/2015-02-sea-slug-genes-algae-](https://phys.org/news/2015-02-sea-slug-genes-algae-photosynthesize.html)

429 [photosynthesize.html](https://phys.org/news/2015-02-sea-slug-genes-algae-photosynthesize.html)

430 10. Cohen J, Goldstone A, Paulsen M, Shudo Y, Steele A, Edwards B, et al. An innovative  
431 biologic system for photon-powered myocardium in the ischemic heart. Science Advances.  
432 2017;3(6). e1603078.

433 [DOI: 10.1126/sciadv.1603078](https://doi.org/10.1126/sciadv.1603078). <https://advances.sciencemag.org/content/3/6/e1603078.full>

434 11. Science Geek. Photosynthesis lab.

435 [https://www.sciencegeek.net/Biology/biopdfs/Lab\\_Photosynthesis.pdf](https://www.sciencegeek.net/Biology/biopdfs/Lab_Photosynthesis.pdf)

436 12. Carolina Biological Supply Company. Plant pigments and photosynthesis.

437 [https://www.ptbeach.com/cms/lib/NJ01000839/Centricity/Domain/113/ap%20biology%20La](https://www.ptbeach.com/cms/lib/NJ01000839/Centricity/Domain/113/ap%20biology%20Labs/apbiolab_04_plant_pigments.pdf)

438 [bs/apbiolab\\_04\\_plant\\_pigments.pdf](https://www.ptbeach.com/cms/lib/NJ01000839/Centricity/Domain/113/ap%20biology%20Labs/apbiolab_04_plant_pigments.pdf)

- 439 13. Ferreira M, Perez C, Marchesano M, Ruiz S, Caputi A, Aguilera P, et al. *Drosophila*  
440 *melanogaster* white mutant *w1118* undergo retinal degeneration. *Frontiers in Neuroscience*.  
441 2018;11. <https://www.frontiersin.org/articles/10.3389/fnins.2017.00732/full>  
442
- 443 14. Nikon Corporation. Nikon upright microscope Eclipse Ni-U instruction manual.  
444 <https://www.manualslib.com/manual/837673/Nikon-Eclipse-Ni-U.html?page=10#manual>  
445
- 446 15. García-Plazaola JI, Fernández-Marín B, Duke SO, Hernández A, López-Arbeloa F, Becerril  
447 JM. Autofluorescence: Biological functions and technical applications. *Plant Sci*. 2015;  
448 236:136-45. doi: 10.1016/j.plantsci.2015.03.010. PMID: 26025527.  
449 <https://www.sciencedirect.com/science/article/pii/S0168945215000801?via%3Dihub>  
450
- 451 16. MiniPCR Bio. Chlorophyll lab: Green glows red. 2019. [https://www.minipcr.com/wp-](https://www.minipcr.com/wp-content/uploads/miniPCR-Chlorophyll-Glow_Lab_student_guide_v1.0_vF.pdf)  
452 [content/uploads/miniPCR-Chlorophyll-Glow\\_Lab\\_student\\_guide\\_v1.0\\_vF.pdf](https://www.minipcr.com/wp-content/uploads/miniPCR-Chlorophyll-Glow_Lab_student_guide_v1.0_vF.pdf)
- 453 17. Tan KL, Vlisidou I, Wood W. Ecdysone mediates the development of immunity in the  
454 *Drosophila embryo*. *Current Biology: CB*. 2014;24(10):1145–1152.  
455 <https://doi.org/10.1016/j.cub.2014.03.062>.  
456 <https://www.ncbi.nlm.nih.gov/pmc/articles/PMC4030305/>
- 457 18. Chaudhary R. Analysis of premature loss of the extraembryonic Amnioserosa in *Drosophila*  
458 morphogenetic mutants. Table 1.1. ResearchGate. 2021.  
459 [https://www.researchgate.net/publication/266222693\\_Analysis\\_of\\_premature\\_loss\\_of\\_the\\_ex](https://www.researchgate.net/publication/266222693_Analysis_of_premature_loss_of_the_extraembryonic_Amnioserosa_in_Drosophila_morphogenetic_mutants)  
460 [traembryonic\\_Amnioserosa\\_in\\_Drosophila\\_morphogenetic\\_mutants](https://www.researchgate.net/publication/266222693_Analysis_of_premature_loss_of_the_extraembryonic_Amnioserosa_in_Drosophila_morphogenetic_mutants)  
461
- 462 19. Davidson M. Photobleaching. Florida State University Optical Microscopy Primer. 2003.  
463 <https://micro.magnet.fsu.edu/primer/java/fluorescence/photobleaching/>
- 464 20. Agapakis CM, Niederholtmeyer H, Noche RR, Lieberman TD, Megason SG, Way JC, et al.  
465 Towards a synthetic chloroplast. *PloS one*. 2011;6(4). e18877.  
466 <https://doi.org/10.1371/journal.pone.0018877>.  
467 <https://www.ncbi.nlm.nih.gov/pmc/articles/PMC3080389/>
- 468 21. Alvarez M, Reynaert N, Chávez M, Aedo G, Araya F, Hopfner U, et al. Generation of viable  
469 plant-vertebrate chimeras. *PLoS ONE*. 2015;10(6). e0130295.  
470 <https://doi.org/10.1371/journal.pone.0130295>
- 471 22. Nass, M. Uptake of isolated chloroplasts by mammalian cells. *Science*.  
472 1969;165(3898):1128-31. <https://www.science.org/doi/10.1126/science.165.3898.1128>  
473
- 474 23. Sagan, L. On the origin of mitosing cells. *Journal of Theoretical Biology*. 1967;14(3):225-  
475 274. IN1-IN6. <https://www.sciencedirect.com/science/article/pii/0022519367900793>  
476
- 477 24. Oliver JL, Marín A, Martínez-Zapater JM. Chloroplast genes transferred to the nuclear plant  
478 genome have adjusted to nuclear base composition and codon usage. *Nucleic Acids Research*.  
479 1990;18(1):65–73. <https://doi.org/10.1093/nar/18.1.65>

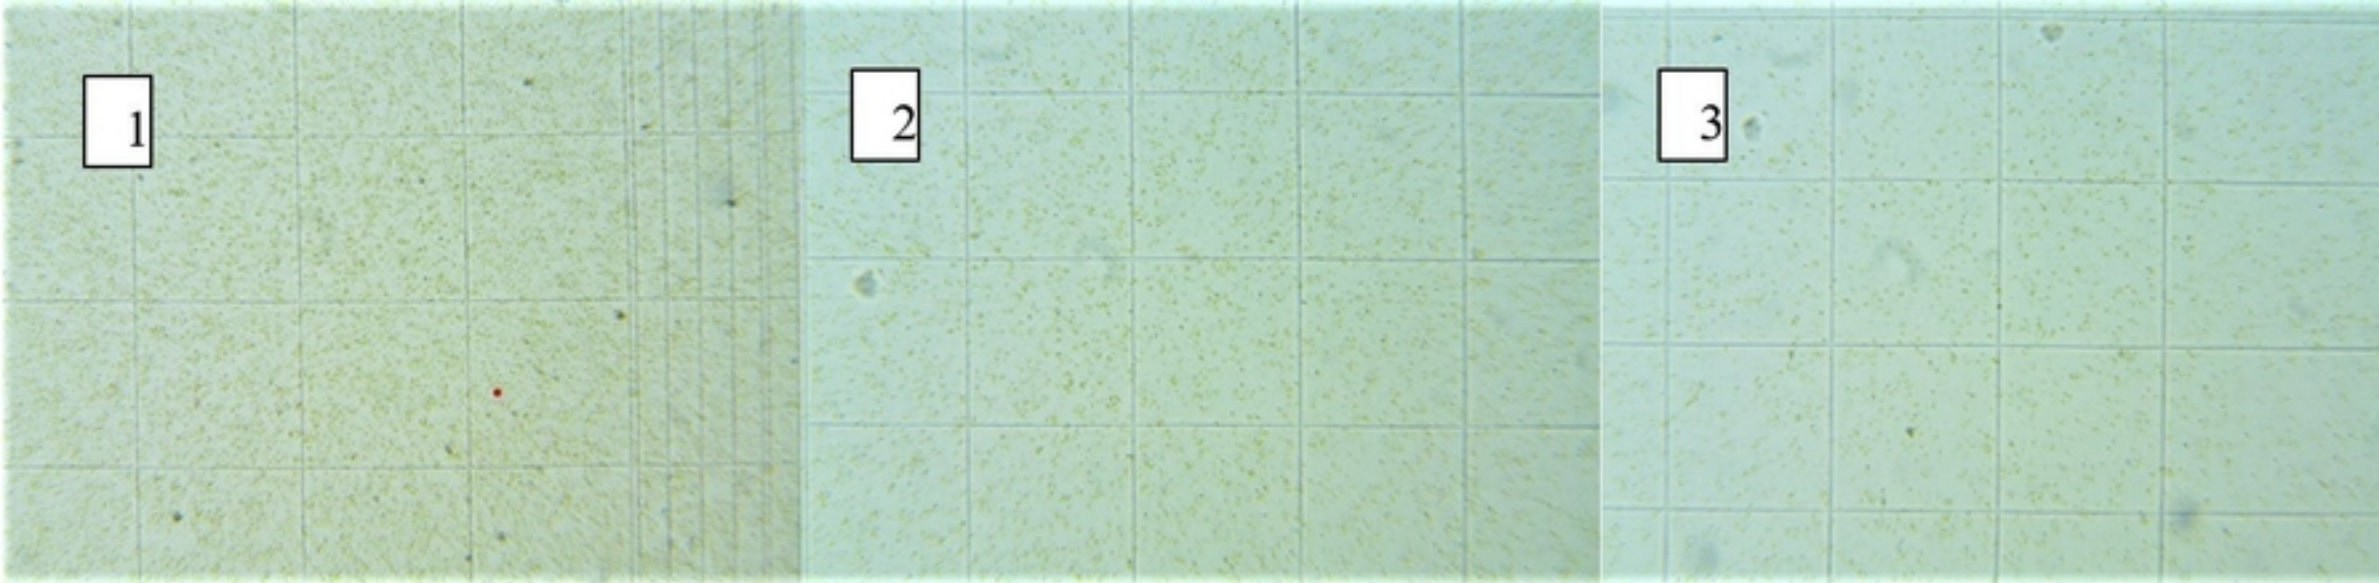

Figure



1

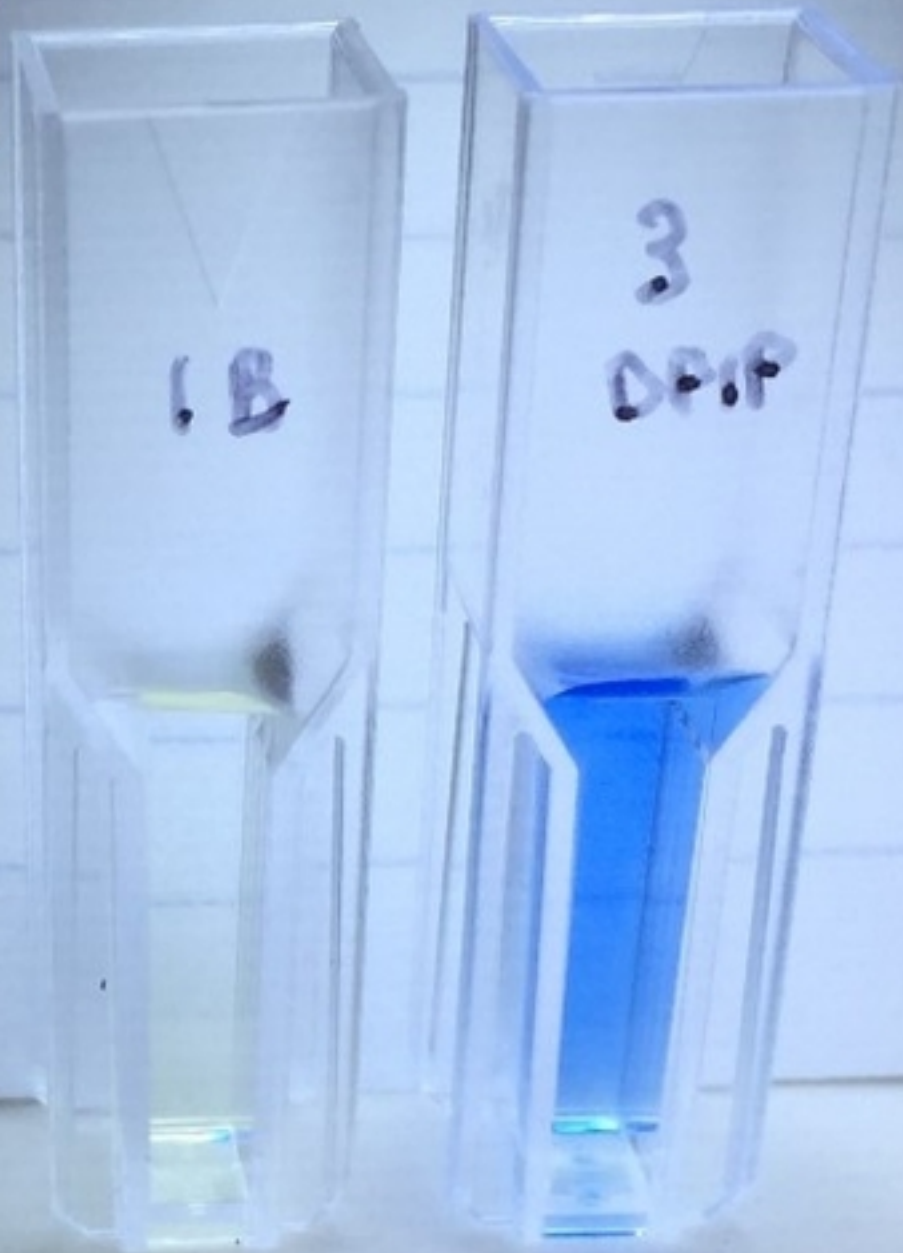

2

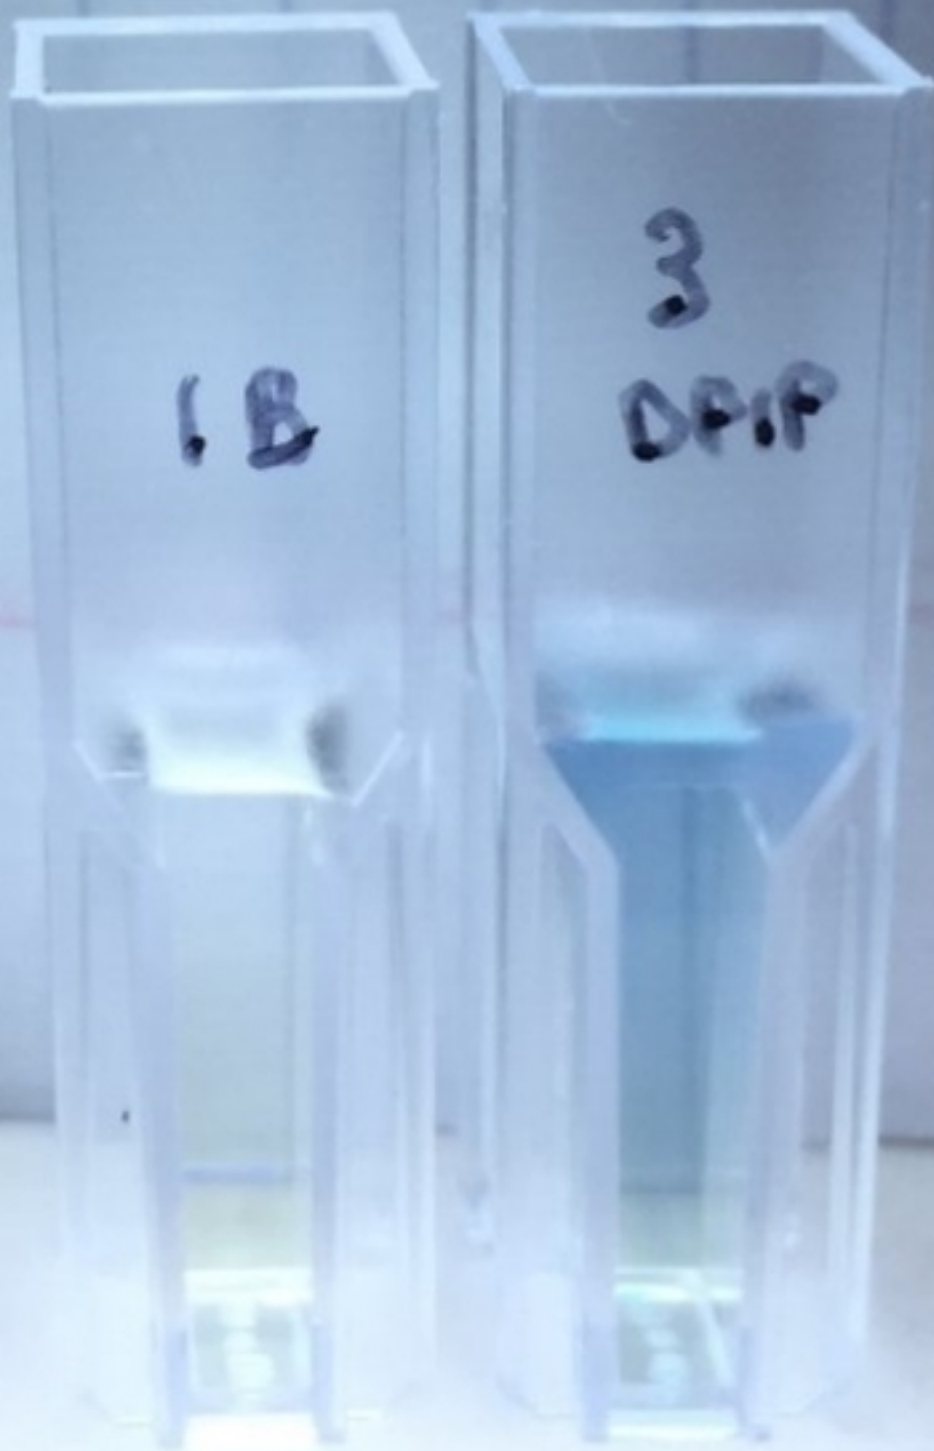

Figure

1

bioRxiv preprint doi: <https://doi.org/10.1101/2021.12.03.471169>; this version posted December 3, 2021. The copyright holder for this preprint (which was not certified by peer review) is the author/funder, who has granted bioRxiv a license to display the preprint in perpetuity. It is made available under aCC-BY 4.0 International license.

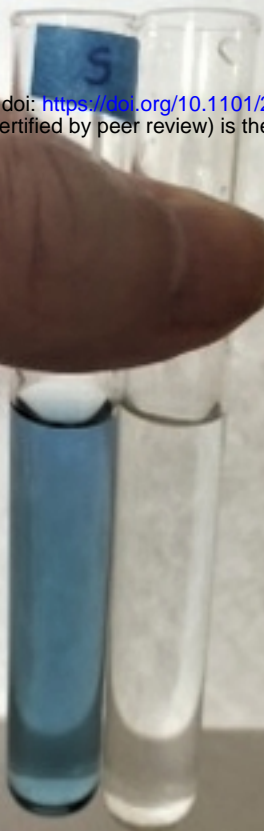

2

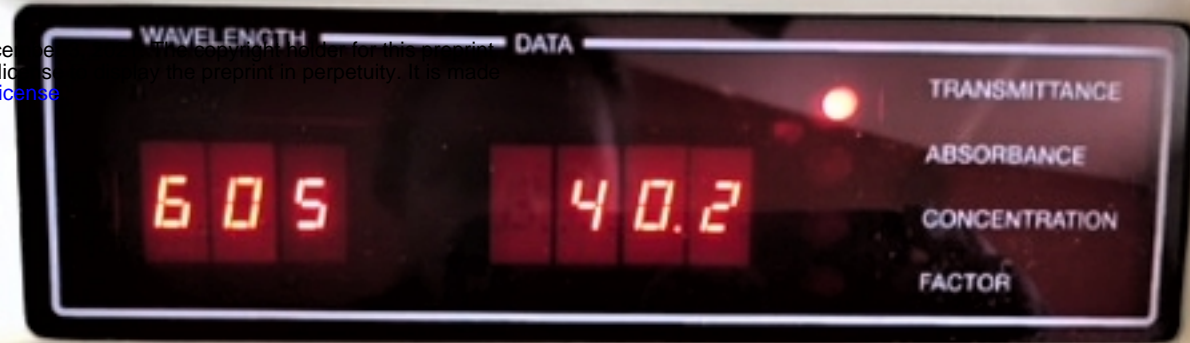

3

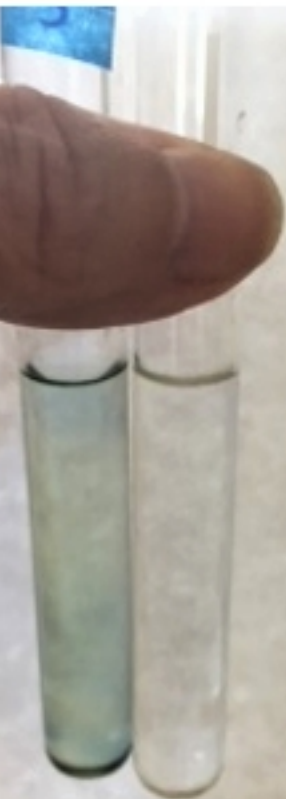

4

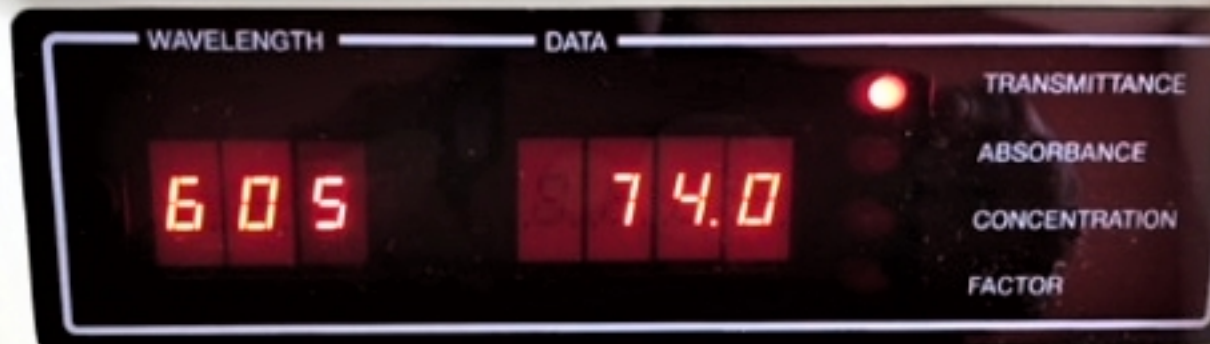

Figure



1

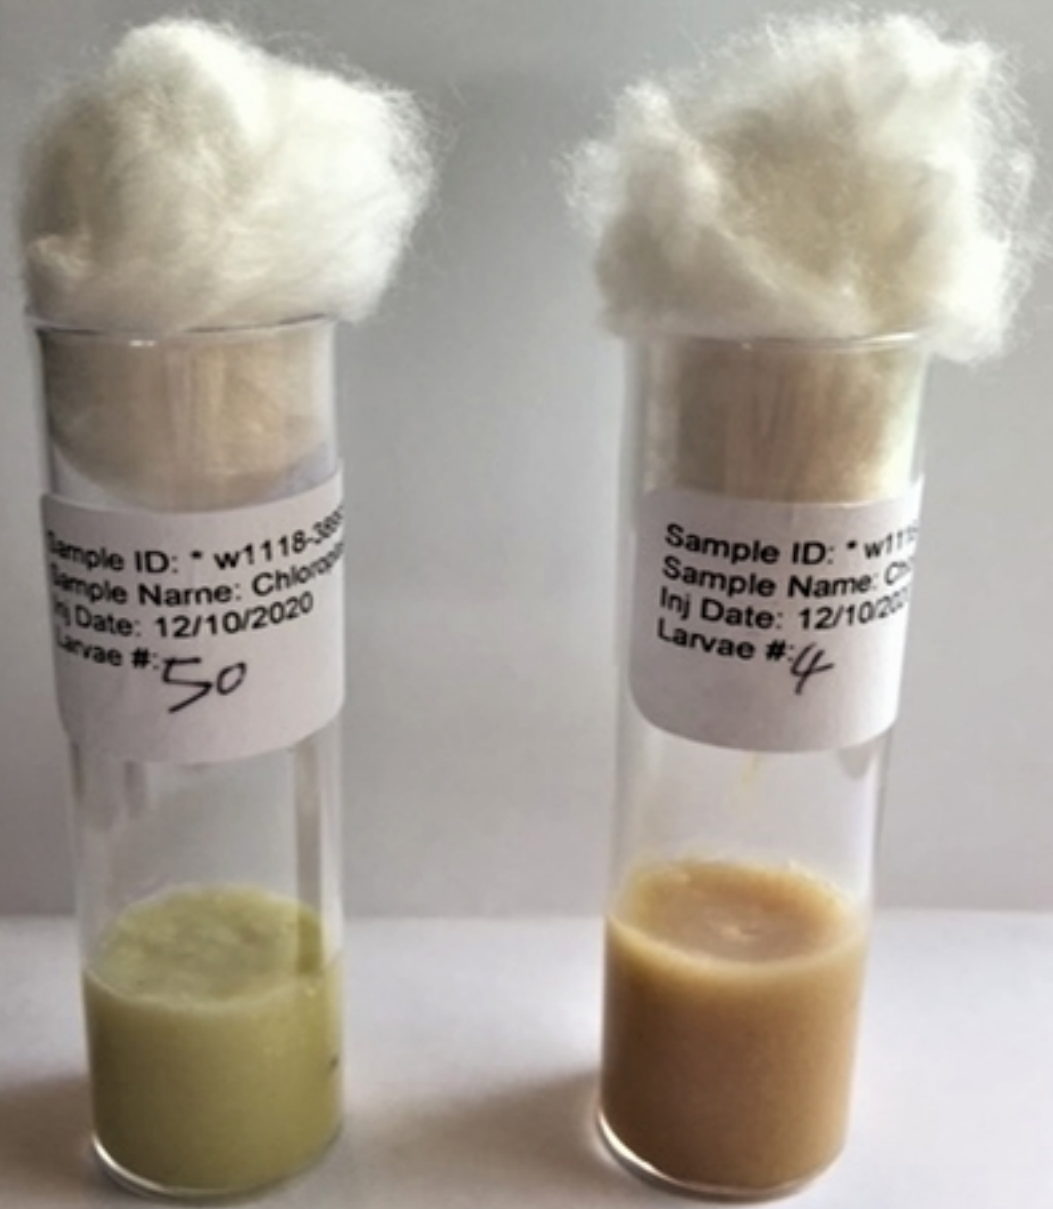

2

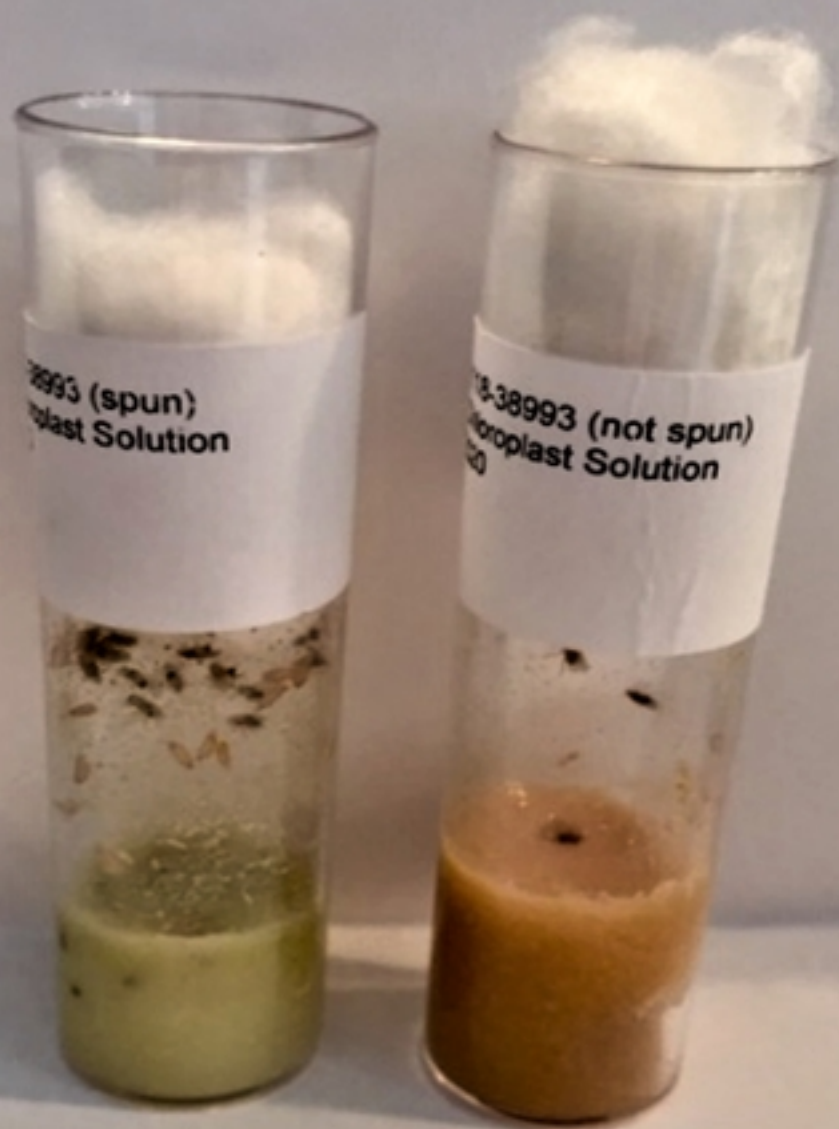

Figure

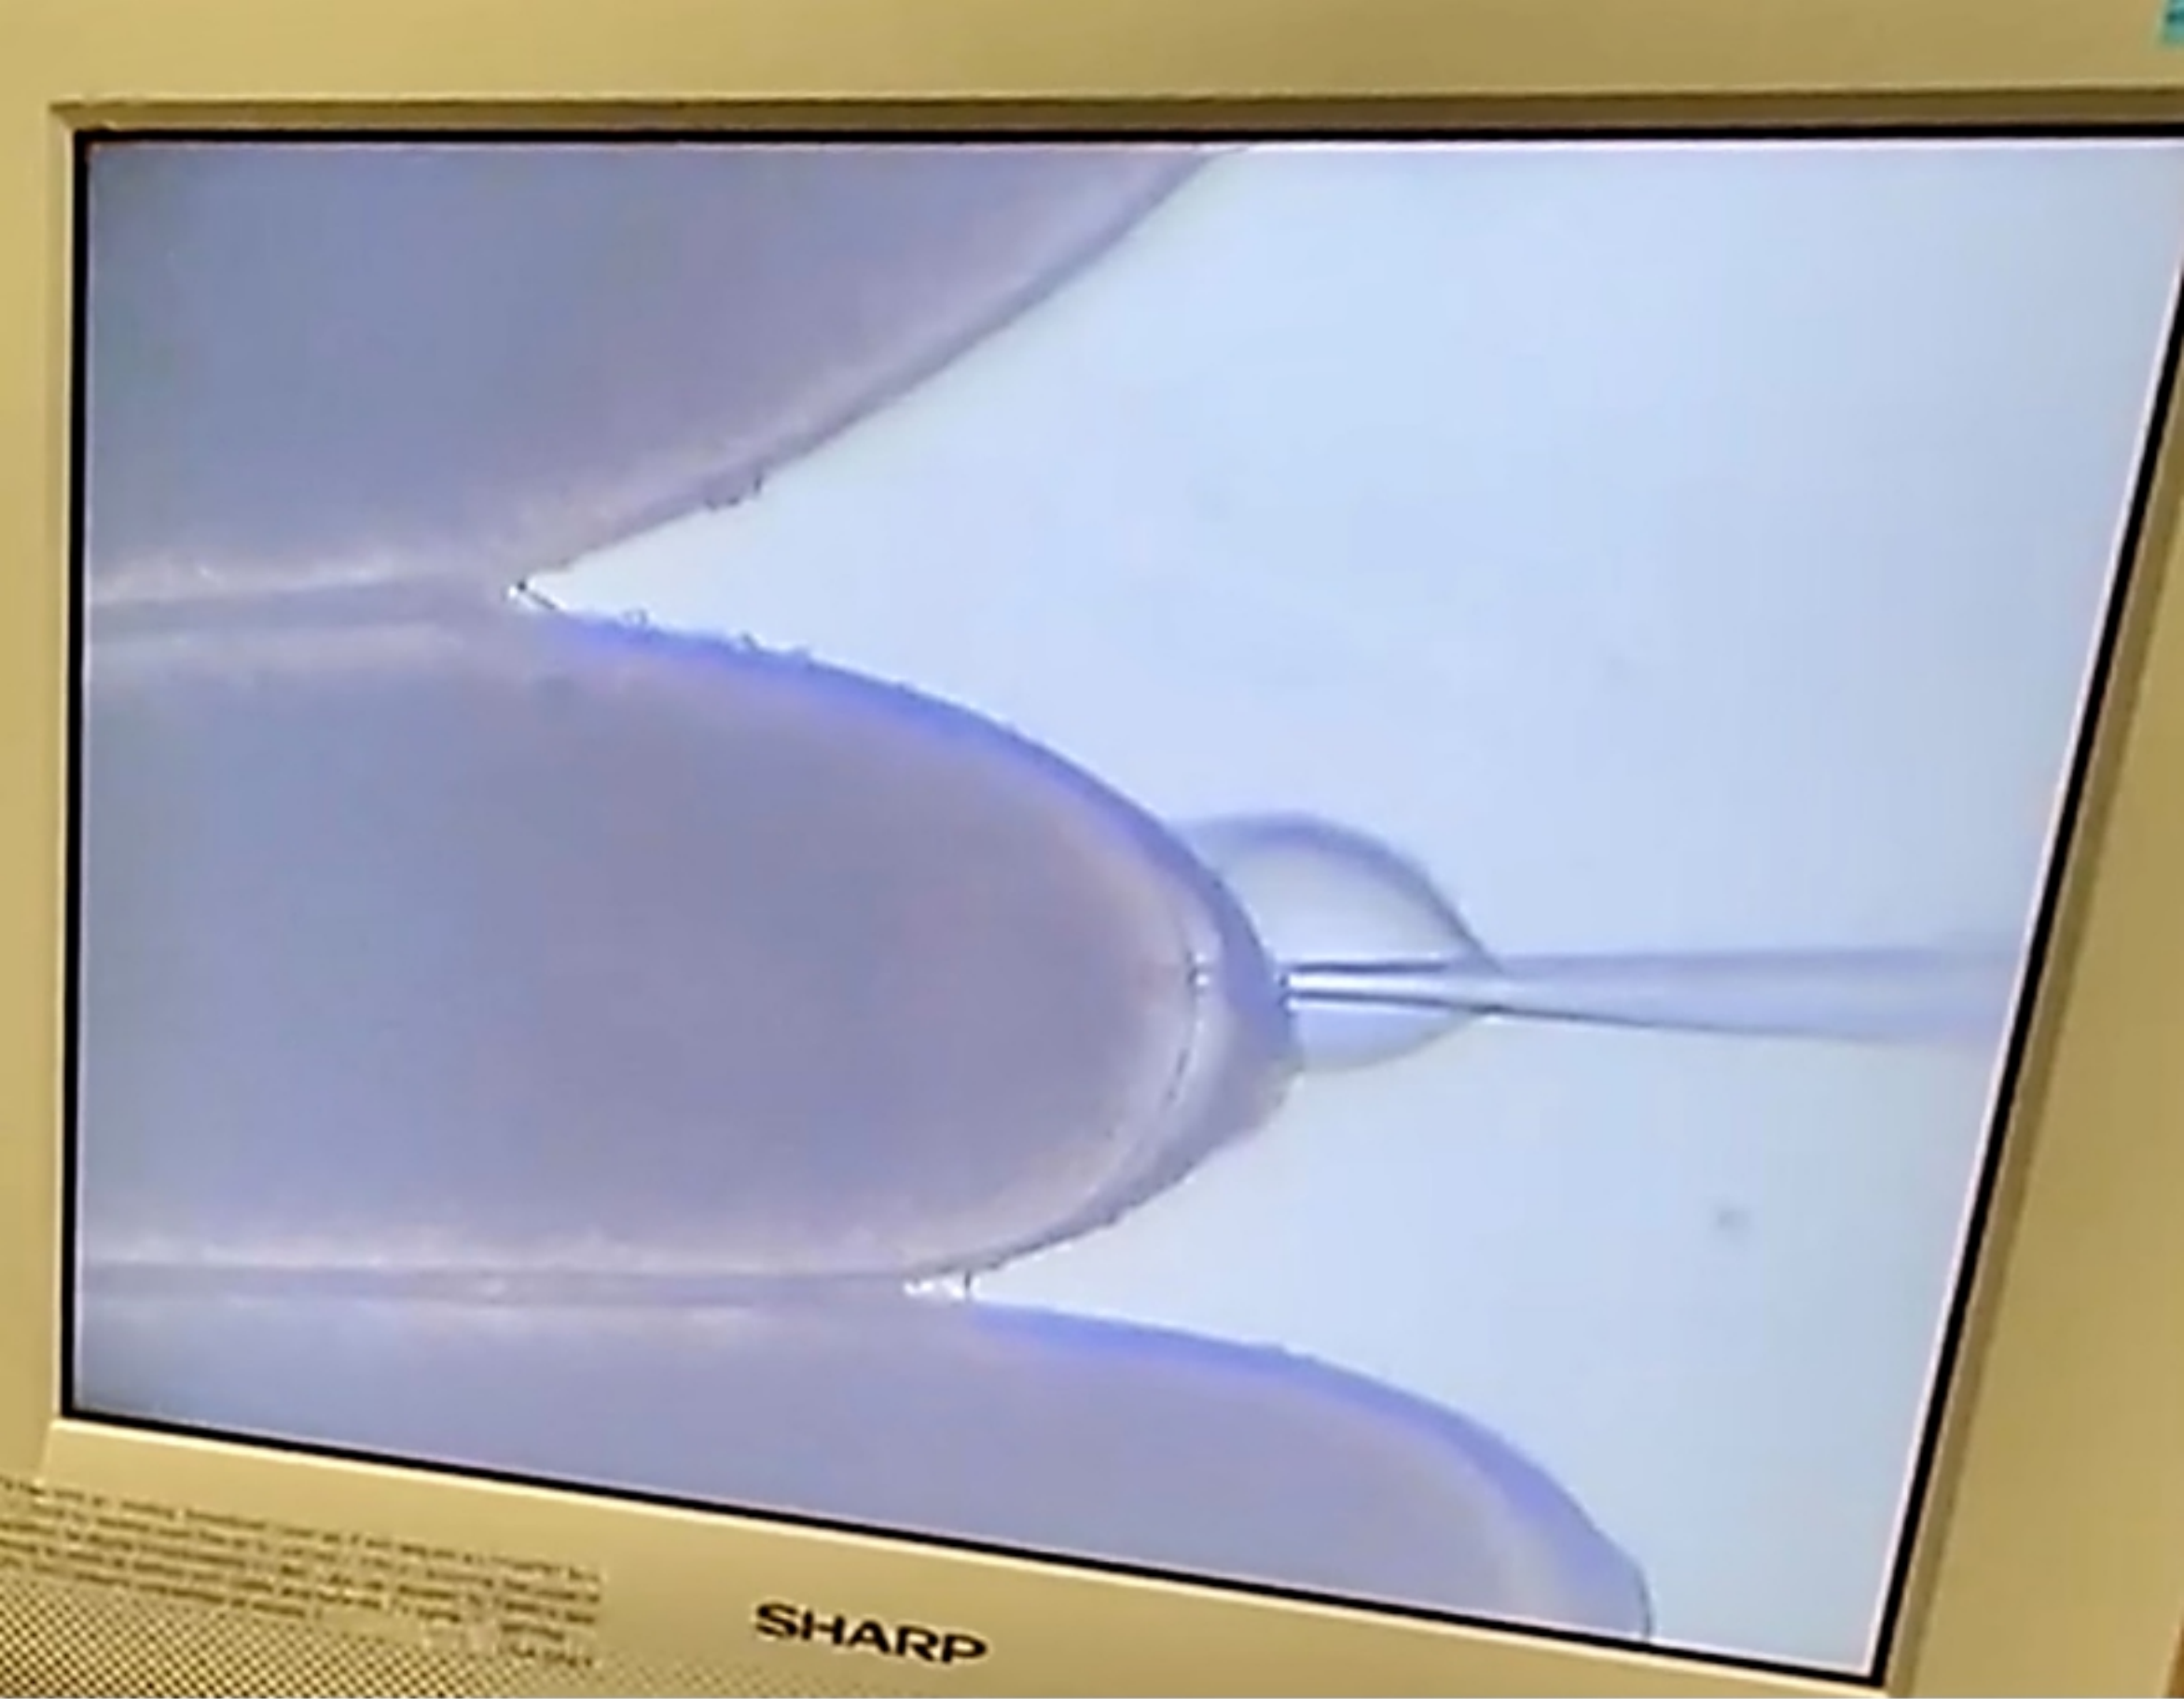

Figure



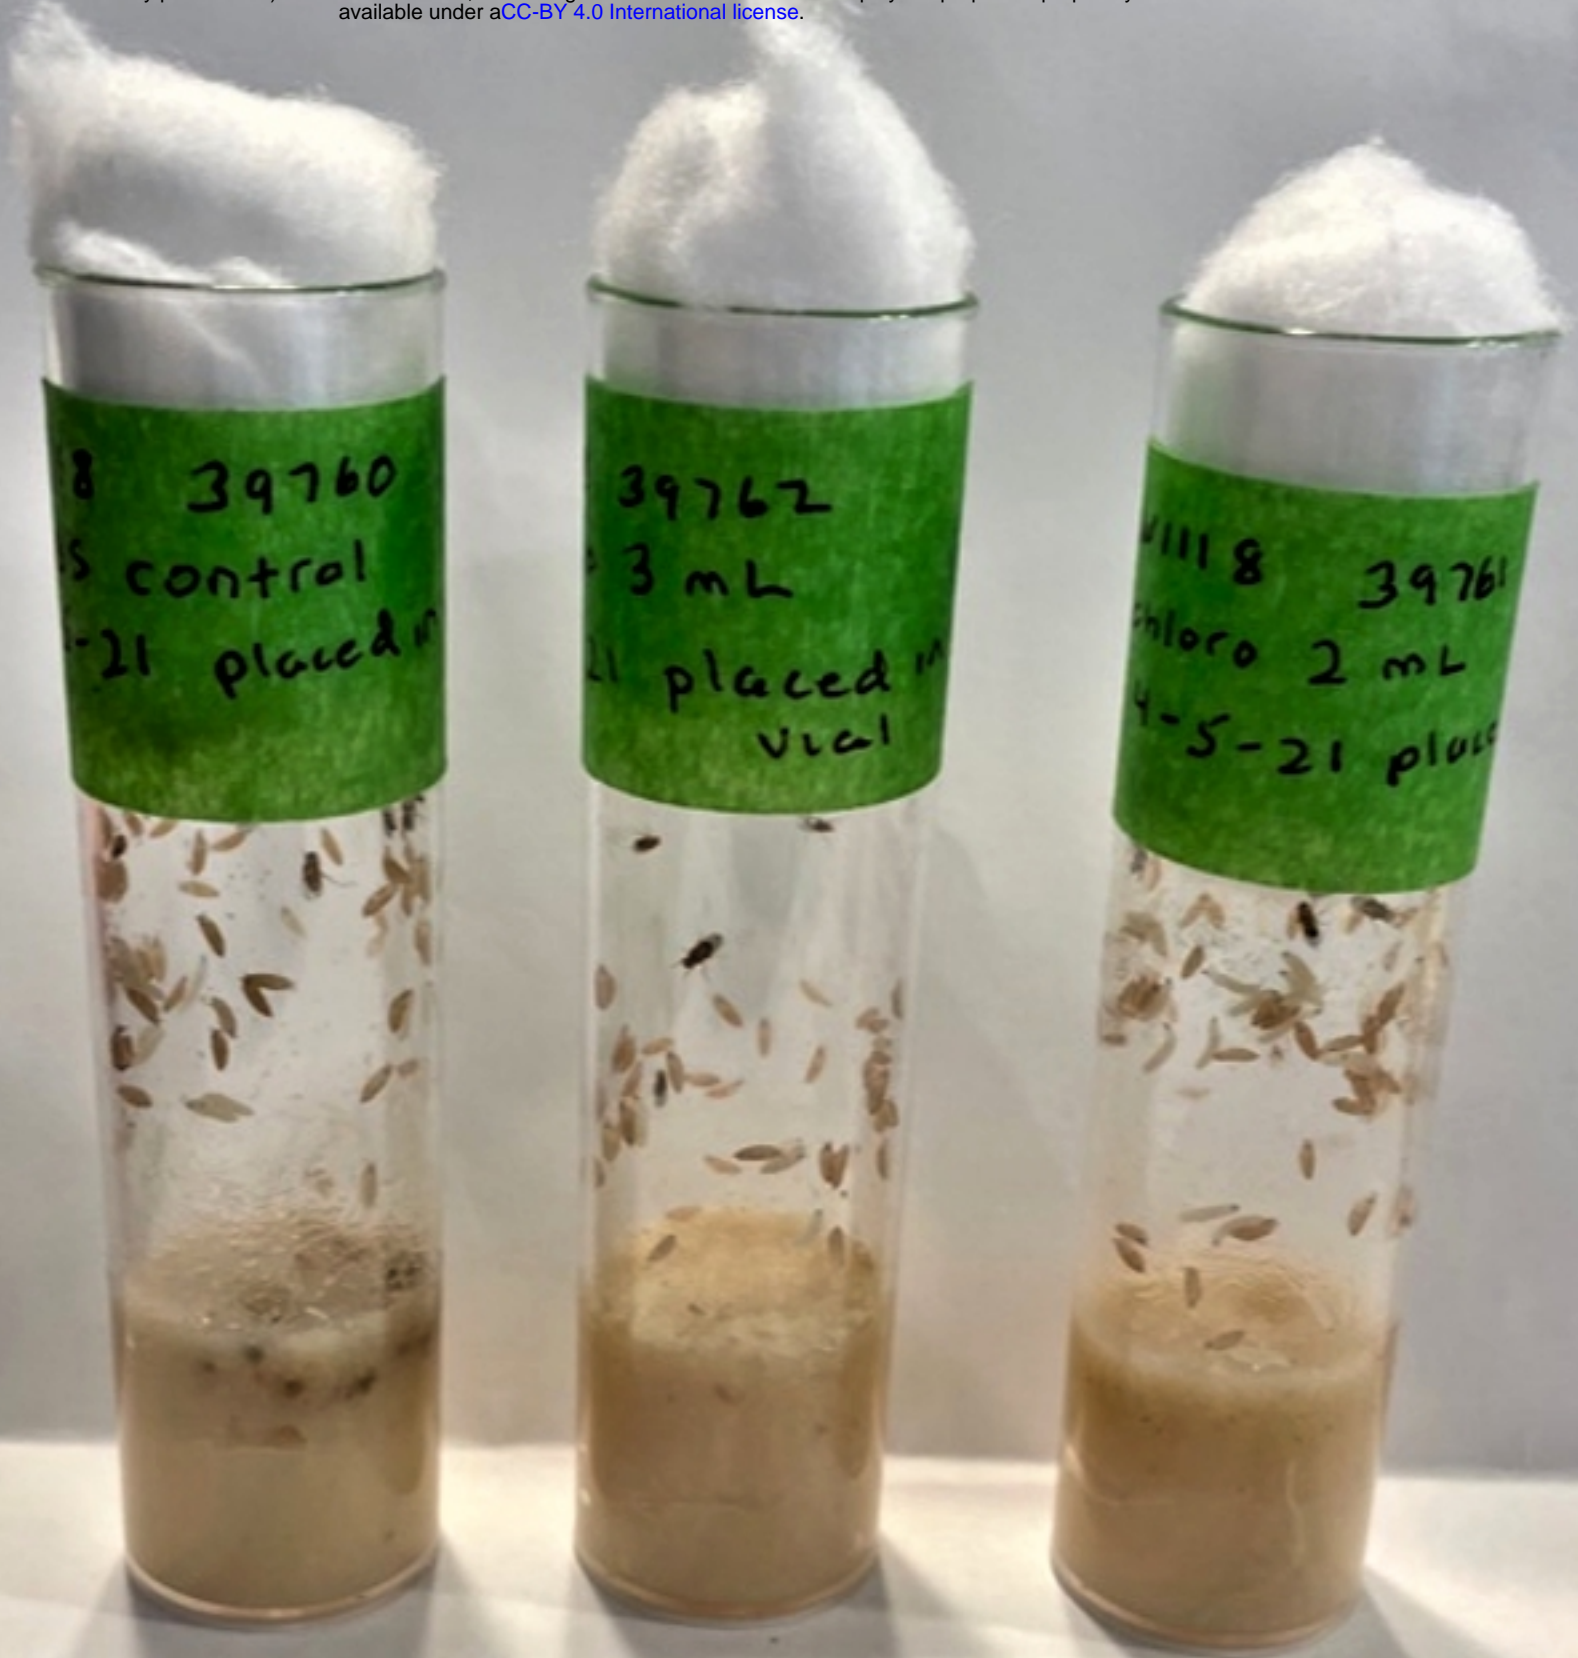

Figure

1

bioRxiv preprint doi: <https://doi.org/10.1101/2021.12.03.471169>; this version posted December 3, 2021.  
(which was not certified by peer review) is the author/funder, who has granted bioRxiv a license to display the preprint in perpetuity. It is made available under aCC-BY 4.0 International license.

2

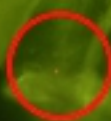

3

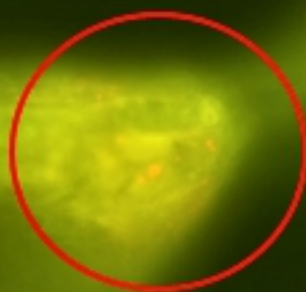

Figure

1

bioRxiv preprint doi: <https://doi.org/10.1101/2021.12.03.471169>; this version posted December 3, 2021 (which was not certified by peer review) is the author/funder, who has granted bioRxiv a license to display the preprint in perpetuity. It is made available under aCC-BY 4.0 International license.

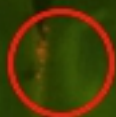

2

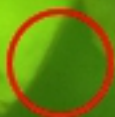

3

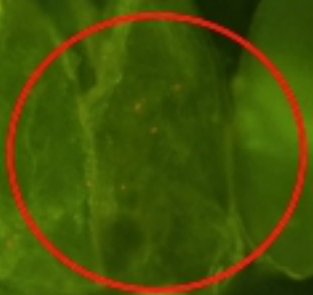

Figure
